# Supplementary material for: Associations between early-life food deprivation during World War II and risk of hypertension and type 2 diabetes at adulthood
Source: PubMed Central journal article supplement (PMC7113250; doi:10.1038/s41598-020-62576-w), 2020-04-01

Point estimates (95% CI)

0.05  
0.00

1925-1929

1930-1934

1935-1939

1940-1945

1946-1950

Birth cohorts

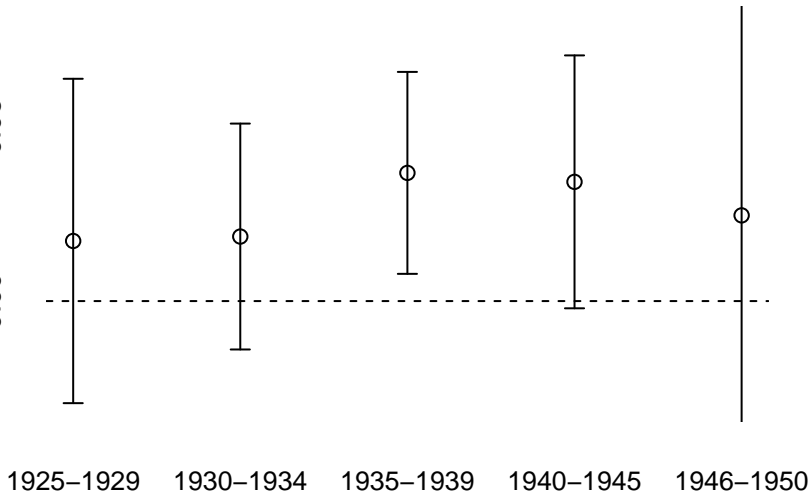

Supplement: 41598_2020_62576_MOESM1_ESM.pdf [file 41598_2020_62576_MOESM1_ESM.pdf]
